# Supplementary material for: Room temperature complete reduction of nitroarenes over a novel Cu/SiO2@NiFe2O4 nano-catalyst in an aqueous medium – a kinetic and mechanistic study
Source: Royal Society of Chemistry journal article supplement (doi:10.1039/c6ra21942j), 2016-01-01

## Supplementary Information

### Room temperature complete reduction of nitroarenes over novel Cu/SiO<sub>2</sub>@NiFe<sub>2</sub>O<sub>4</sub> nano-catalyst in aqueous medium – A kinetic and mechanistic study

Mira V. Parmekar and A. V. Salker\*

Department of Chemistry, Goa University, Taleigao-Goa, India, 403206.

Email: [sal\\_arun@rediffmail.com](mailto:sal_arun@rediffmail.com); [sav@unigoa.ac.in](mailto:sav@unigoa.ac.in)

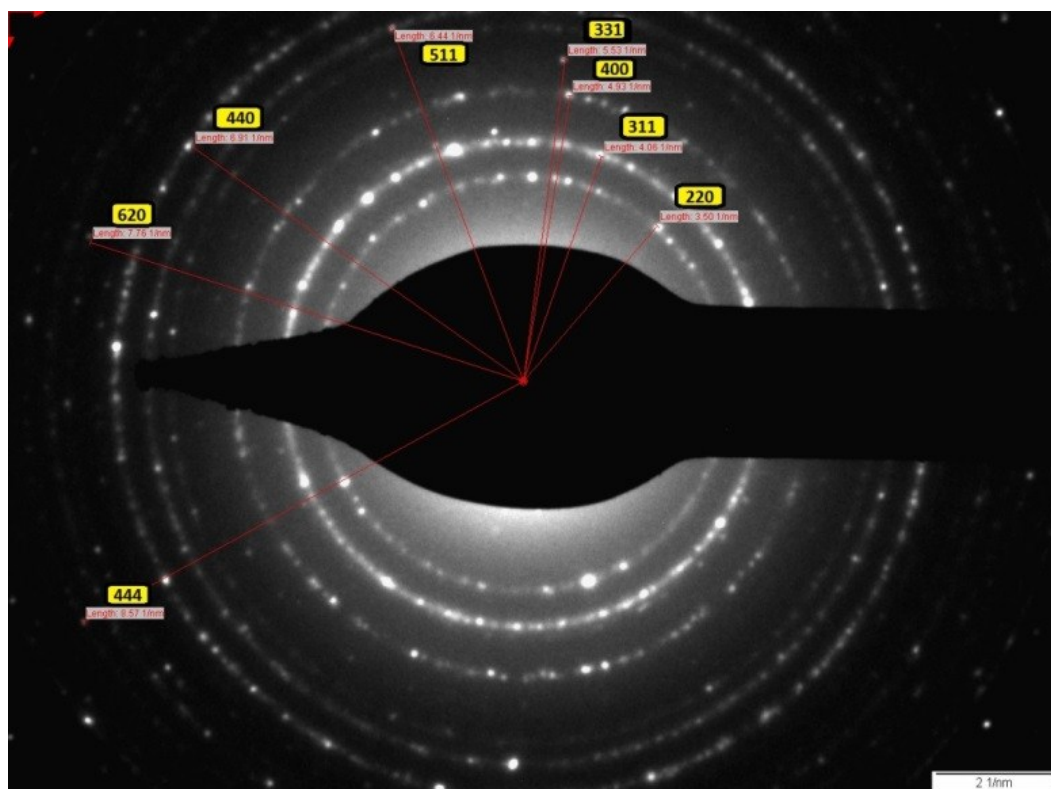

Fig. S1. ED indexing of NiFe<sub>2</sub>O<sub>4</sub>.

# Supplementary Information

## EDS data

### MP1.1

Spectrum processing :

Peak possibly omitted : 0.271 keV

Processing option : All elements analyzed (Normalised)

Number of iterations = 3

Standard :

O SiO<sub>2</sub> 1-Jun-1999 12:00 AM

Si SiO<sub>2</sub> 1-Jun-1999 12:00 AM

Fe Fe 1-Jun-1999 12:00 AM

Ni Ni 1-Jun-1999 12:00 AM

Cu Cu 1-Jun-1999 12:00 AM

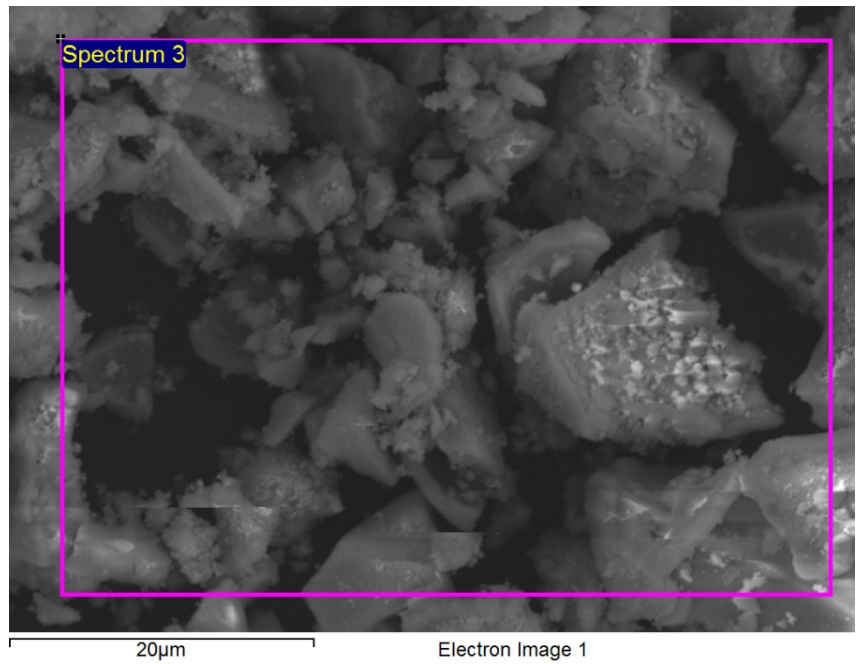

| Element | Weight% | Atomic% |
|---------|---------|---------|
| O K     | 32.91   | 61.19   |
| Si K    | 8.20    | 8.68    |
| Fe K    | 29.85   | 15.90   |
| Ni K    | 16.35   | 8.28    |
| Cu L    | 12.69   | 5.94    |
| Totals  | 100.00  |         |

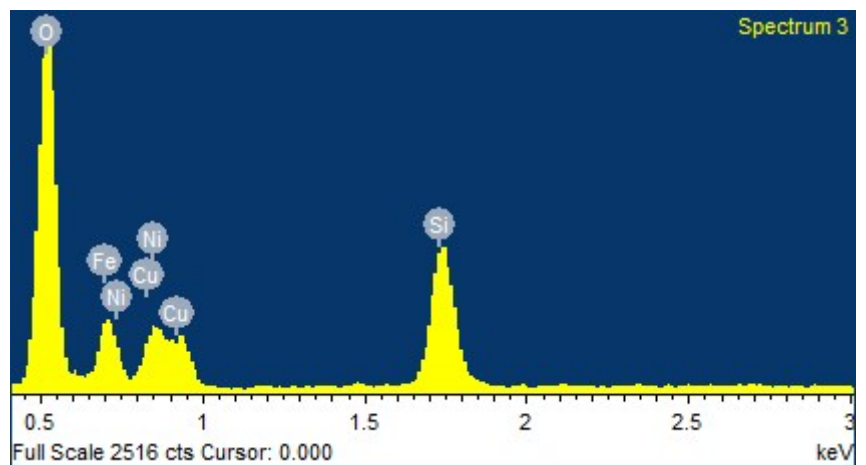

## Supplementary Information

### Elemental Mapping

The elemental mapping data showing uniform distribution of Si and Cu on the support.

MP1.1

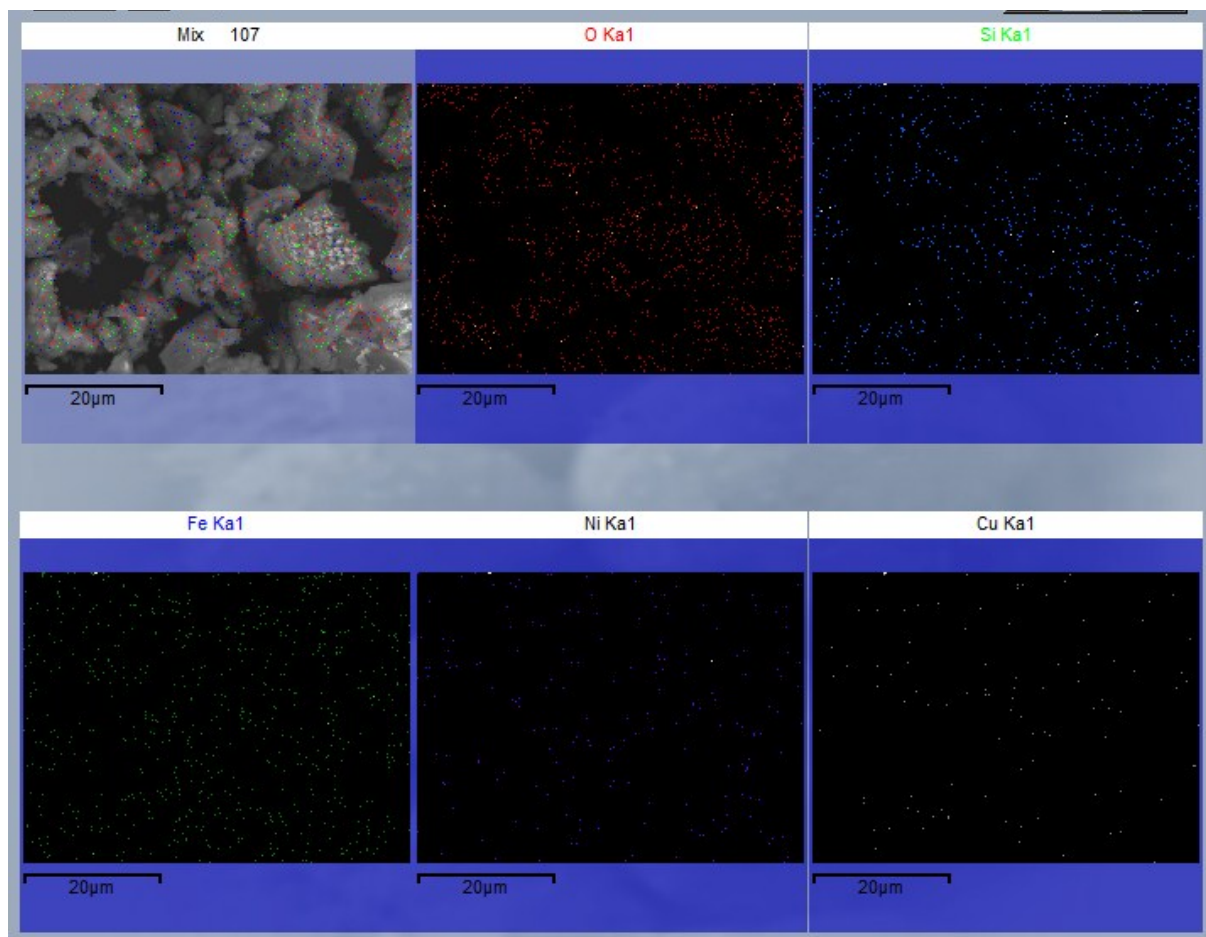

## Supplementary Information

### XPS of individual elements

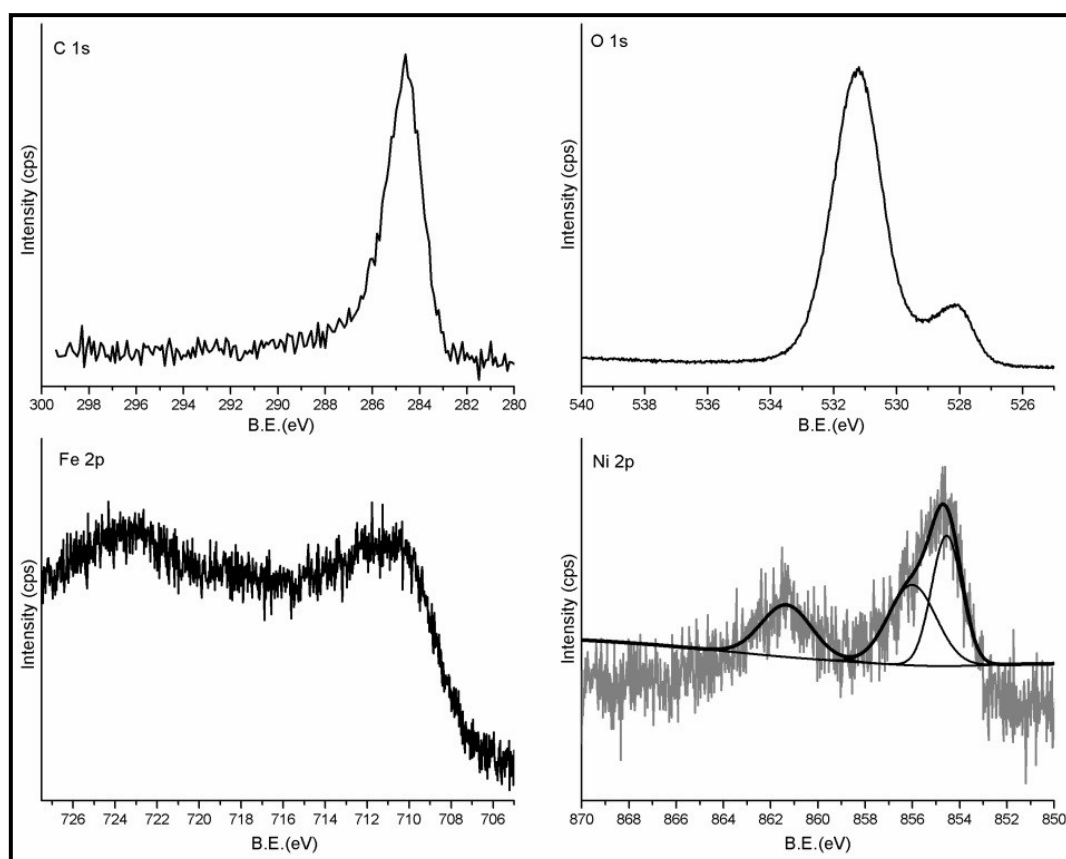

**Fig. S2.** XPS spectrum showing C 1s peak calibrated to 284.6eV. Remaining spectra are of individual elements present in the active catalyst sample Cu/SiO<sub>2</sub>@NiFe<sub>2</sub>O<sub>4</sub>. Starting from left C 1s, O 1s, Fe 2p, Ni2p.

## VSM

**Table S1**

Magnetisation data of the samples

| Sample                                                | Ms(emu/g) | Mr (emu/g) | Hc (Oe) |
|-------------------------------------------------------|-----------|------------|---------|
| Cu/SiO <sub>2</sub> @NiFe <sub>2</sub> O <sub>4</sub> | 22.1165   | 2.6510     | 232     |
| SiO <sub>2</sub> @NiFe <sub>2</sub> O <sub>4</sub>    | 24.4882   | 2.3524     | 200     |
| NiFe <sub>2</sub> O <sub>4</sub>                      | 28.7444   | 2.5489     | 132     |

Ms- Saturation Magnetization

Mr- Remanent Magnetization

Hc - Coercivity

As expected the saturation magnetisation (Ms) was highest for NiFe<sub>2</sub>O<sub>4</sub> which decreased after silica coating and was found lowest for Cu/SiO<sub>2</sub>@NiFe<sub>2</sub>O<sub>4</sub> as seen in the fig. S6.

# Supplementary Information

## Product characterisation

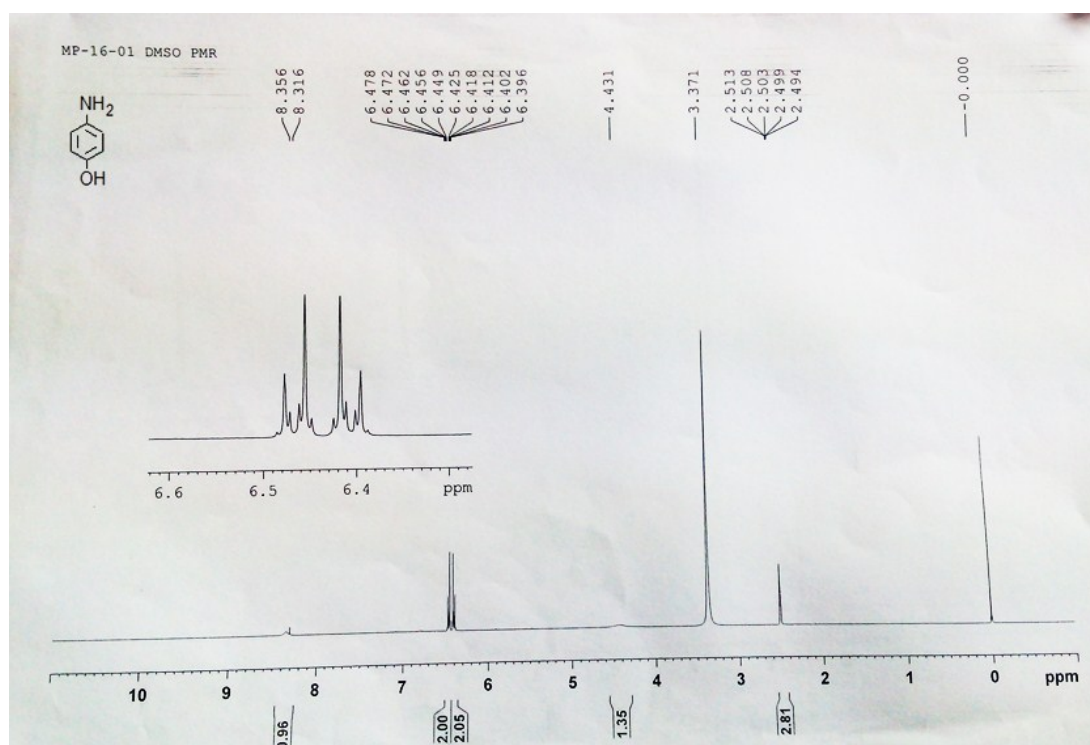

**Fig. S3.**  $^1\text{H}$  NMR spectrum of the isolated product when performed on 1 mmol scale matches with reference <sup>1</sup>.

## Reference

- 1 T. Aditya and T. Pal, *Chem. Commun.*, 2015, **51**, 9410–9431.

## Supplementary Information

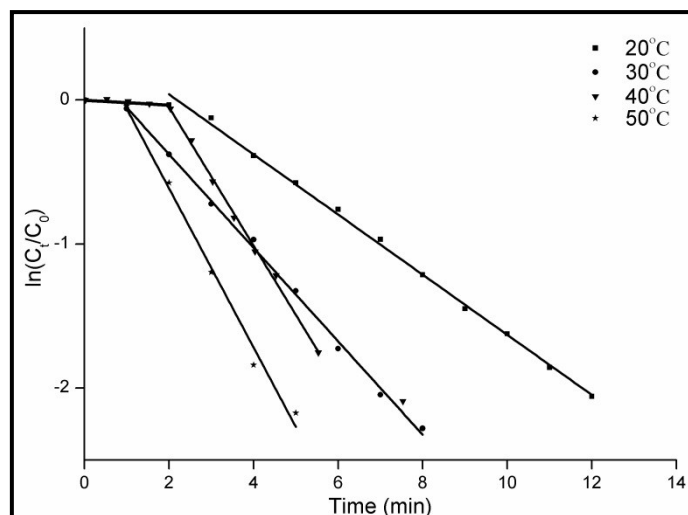

Fig. S4. Plot of  $k$  at different temperatures.

Table S2

Recyclability of the catalyst

| Cycle           | Time (min) for total conversion |
|-----------------|---------------------------------|
| 1 <sup>st</sup> | 7                               |
| 2 <sup>nd</sup> | 7                               |
| 3 <sup>rd</sup> | 11                              |
| 4 <sup>th</sup> | 14                              |
| 5 <sup>th</sup> | 20                              |

Table S3

Solvent Studies using Nitrobenzene (0.5 mmol), Catalyst (6 mg), NaBH<sub>4</sub> (2.5 mmol)

| Entry | Solvent system         | Observations*                   |
|-------|------------------------|---------------------------------|
| 1     | THF                    | no desired product              |
| 2     | Acetonitrile           | no desired product              |
| 3     | Methanol               | 3.5h for complete conversion    |
| 4     | Ethanol                | 5h for complete conversion      |
| 5     | Water                  | 2.5h for complete conversion    |
| 6     | 1:1 Water-THF          | 8h for complete conversion      |
| 7     | 1:1 Water-Acetonitrile | Multiple spots even after 5h    |
| 8     | 1:1 Water-Ethanol      | Over 7h for complete conversion |
| 9     | 1:1 Water-Methanol     | 2h for complete conversion      |

\* Reactions were monitored on TLC.

## Supplementary Information

### GC CHROMATOGRAMS

Data File : E:\Mira\nitro\rxn\nitrobenzene\nitrobenz+anilin+azobenz+nitroso std 120-160-180-220-260.Dat

Method File :

Sample Name : Sample1

Analysis Type : Percent Method

Detector : FID

Time : 9:18:17 PM

System : GC

Chan No : Chan 2

Run Date : 8/5/2016

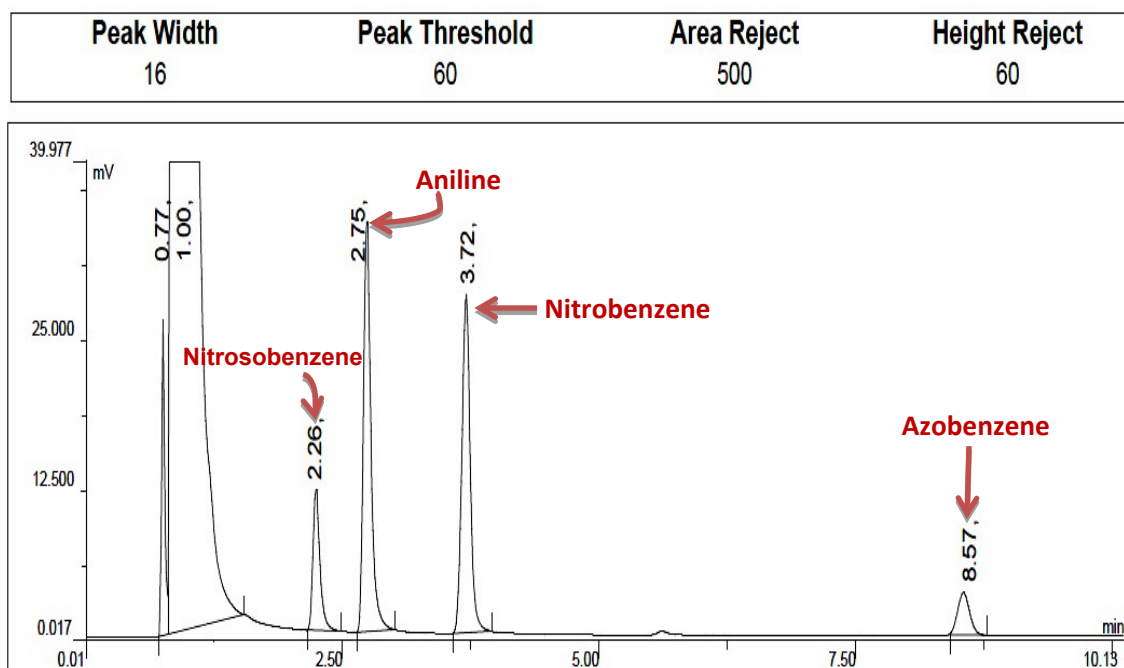

**Fig. S5.** A representative GC chromatogram showing Rt values of reactant Nitrobenzene, product aniline, and two intermediates Nitrosobenzene and Azobenzene.

All the GC runs were carried out using Ovi 101 column and same sequencer settings.

The above chromatograph displays the probable components of Nitrobenzene reduction. Authentic samples were injected individually to determine the retention time of the components with the set program. The subsequent chromatographs show the progress of the reaction with time in presence of Cu/SiO<sub>2</sub>@NiFe<sub>2</sub>O<sub>4</sub>.

**\*NOTE:** Since the boiling point of aniline (179°C) and the internal standard used n-decane (174 °C) are very closed and it couldn't be well resolved at the set program, internal standard wasn't used while performing the mechanistic studies.

# Supplementary Information

## Mechanistic Study using Nitrobenzene as substrate over time

Sample Name : Sample1  
Detector : FID  
System : GC  
Run Date : 8/5/2016

Analysis Type : Percent Method  
Time : 5:33:06 PM  
Chan No : Chan 2

| Peak Width | Peak Threshold | Area Reject | Height Reject |
|------------|----------------|-------------|---------------|
| 16         | 60             | 500         | 60            |

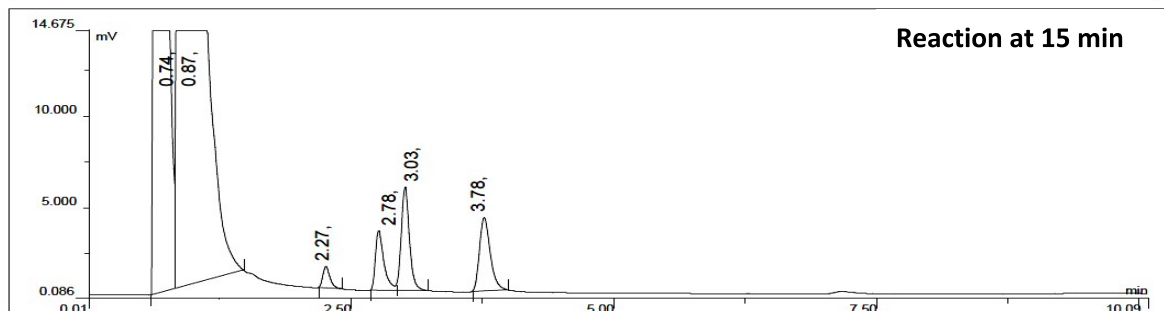

Sample Name : Sample1  
Detector : FID  
System : GC  
Run Date : 8/5/2016

Analysis Type : Percent Method  
Time : 5:52:38 PM  
Chan No : Chan 2

| Peak Width | Peak Threshold | Area Reject | Height Reject |
|------------|----------------|-------------|---------------|
| 16         | 60             | 500         | 60            |

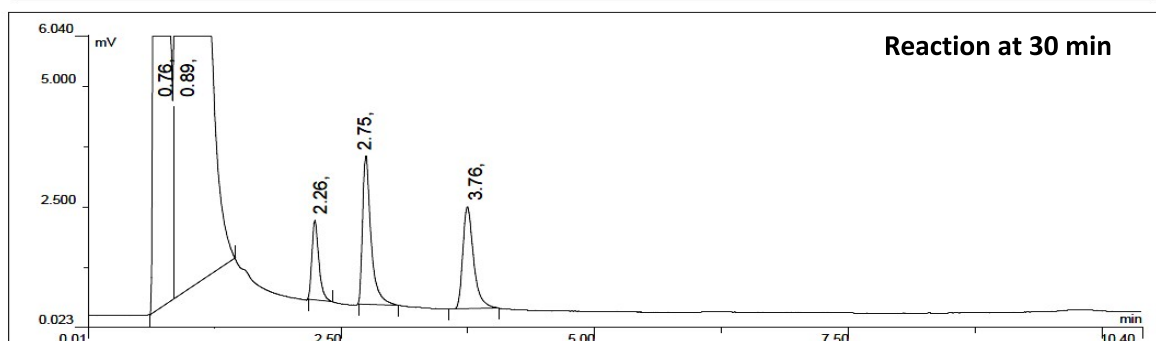

Sample Name : Sample1  
Detector : FID  
System : GC  
Run Date : 8/5/2016

Analysis Type : Percent Method  
Time : 6:06:52 PM  
Chan No : Chan 2

| Peak Width | Peak Threshold | Area Reject | Height Reject |
|------------|----------------|-------------|---------------|
| 16         | 60             | 500         | 60            |

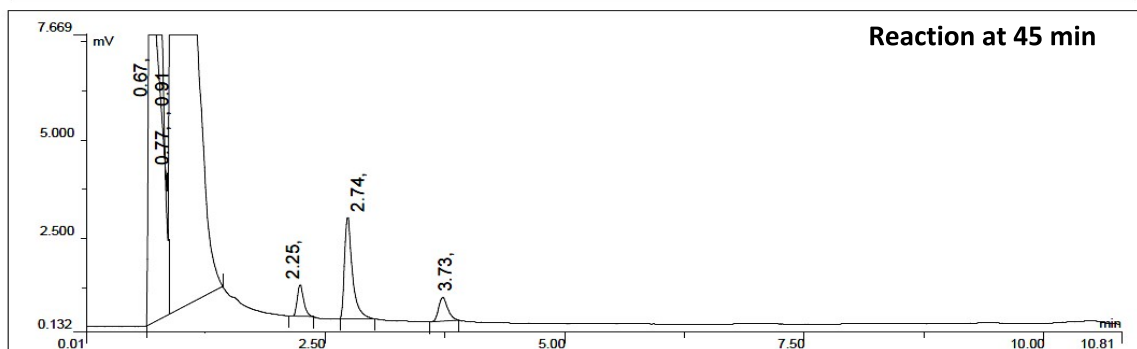



# Supplementary Information

**Sample Name :** Sample1  
**Detector :** FID  
**System :** GC  
**Run Date :** 8/5/2016

**Analysis Type :** Percent Method  
**Time :** 6:21:29 PM  
**Chan No :** Chan 2

| Peak Width | Peak Threshold | Area Reject | Height Reject |
|------------|----------------|-------------|---------------|
| 16         | 60             | 500         | 60            |

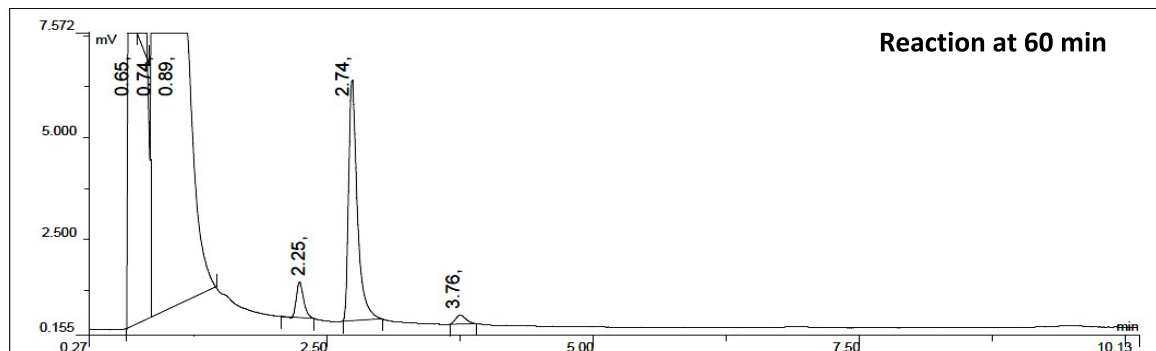

**Sample Name :** Sample1  
**Detector :** FID  
**System :** GC  
**Run Date :** 8/5/2016

**Analysis Type :** Percent Method  
**Time :** 6:34:37 PM  
**Chan No :** Chan 2

| Peak Width | Peak Threshold | Area Reject | Height Reject |
|------------|----------------|-------------|---------------|
| 16         | 60             | 500         | 60            |

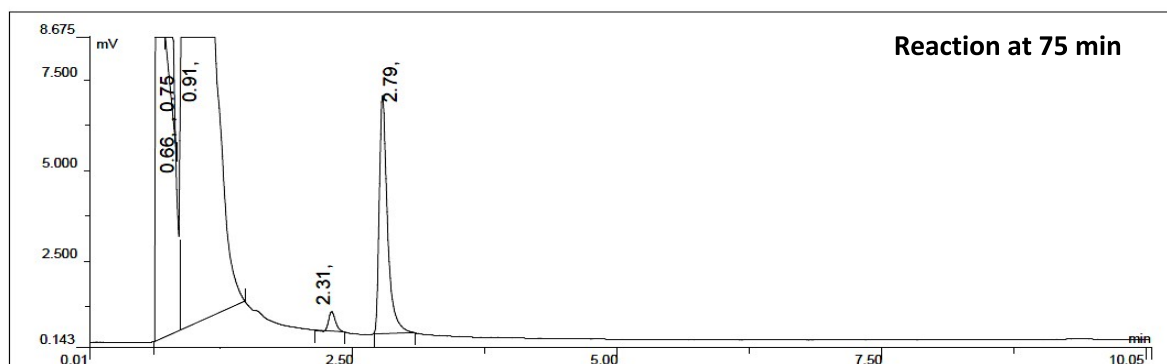

**Sample Name :** Sample1  
**Detector :** FID  
**System :** GC  
**Run Date :** 8/5/2016

**Analysis Type :** Percent Method  
**Time :** 6:49:15 PM  
**Chan No :** Chan 2

| Peak Width | Peak Threshold | Area Reject | Height Reject |
|------------|----------------|-------------|---------------|
| 16         | 60             | 500         | 60            |

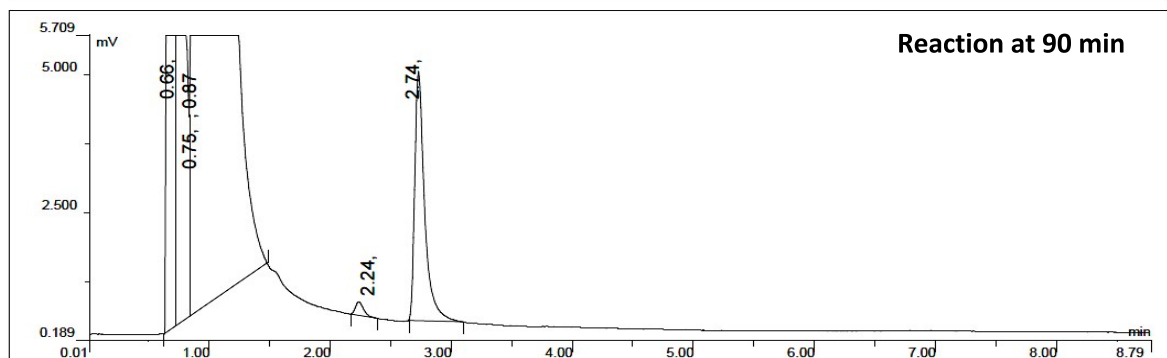

Supplement: c6ra21942j1.pdf [file c6ra21942j1.pdf]
